# Supplementary material
Source: ML conference proceedings conference paper supplement (https://openaccess.thecvf.com/content/cvpr_2015/html/Wu_New_Insights_Into_2015_CVPR_paper.html)
Supplement: Supplementary file 1 [file Wu_New_Insights_Into_2015_CVPR_supplemental.pdf]

# Supplement for “New Insights into Laplacian Similarity Search”

Xiao-Ming Wu<sup>1</sup>   Zhenguo Li<sup>2</sup>   Shih-Fu Chang<sup>1</sup>

<sup>1</sup>Department of Electrical Engineering, Columbia University

<sup>2</sup>Huawei Noah’s Ark Lab, Hong Kong

{xmwu, sfchang}@ee.columbia.edu   li.zhenguo@huawei.com

## Abstract

*This is the supplement for our main paper “New Insights into Laplacian Similarity Search” [3]. Here, we show the proofs of all the theoretical arguments in the main paper.*

**Proof of Statements in Sec. 2.1:**  $M$  is positive and symmetric, i.e.,  $\forall i, j, m_{ij} > 0$ , and  $m_{ij} = m_{ji}$ . Regardless of  $\Lambda$ ,  $m_{ii}$  is always the unique largest element in the  $i$ -th column and row of  $M$ .

*Proof.* (a) Since  $L + \alpha\Lambda$  is symmetric,  $M = (L + \alpha\Lambda)^{-1}$  is symmetric.

(b) Note that

$$\begin{aligned} M &= (L + \alpha\Lambda)^{-1} = (D + \alpha\Lambda - W)^{-1} \\ &= (I - (D + \alpha\Lambda)^{-1}W)^{-1}(D + \alpha\Lambda)^{-1} \\ &= \left( \sum_{k=0}^{\infty} [(D + \alpha\Lambda)^{-1}W]^k \right) (D + \alpha\Lambda)^{-1}, \end{aligned}$$

from which we can see that  $M$  is positive since the graph is connected.

(c) Now we show that  $m_{jj}$  is the unique largest in its column. Assume, to the contrary, there exists  $i, j, i \neq j$ , such that  $m_{jj} \leq m_{ij}$ . Denote  $k = \arg \max_{i \neq j} m_{ij}$ . Note that  $M$  is symmetric and  $M > 0$ . Let  $B = (b_{ij}) := D + \alpha\Lambda - W$ . Note that  $B$  is symmetric and strictly diagonally dominant, i.e.,  $\forall k, b_{kk} > \sum_{i \neq k} |b_{ki}|$ . By  $BM = I$ , we have  $0 = B(k, :)M(:, j) = \sum_i b_{ki}m_{ij} = b_{kk}m_{kj} + \sum_{i \neq k} b_{ki}m_{ij} \geq b_{kk}m_{kj} - (\sum_{i \neq k} |b_{ki}|)m_{kj} = (b_{kk} - \sum_{i \neq k} |b_{ki}|)m_{kj} > 0$ , which contradicts the assumption.  $\square$

### Proof of Theorem 2.1:

$$\begin{aligned} M &= C + E, \text{ where } C = \frac{1}{\alpha \sum_i \lambda_i} \mathbf{1}\mathbf{1}^\top, \text{ and } E = \\ &\Lambda^{-\frac{1}{2}} \left( \sum_{i=2}^n \frac{1}{\gamma_i + \alpha} \mathbf{u}_i \mathbf{u}_i^\top \right) \Lambda^{-\frac{1}{2}}. \end{aligned}$$

*Proof.* By definition,

$$\begin{aligned} M &= (L + \alpha\Lambda)^{-1} \\ &= \Lambda^{-\frac{1}{2}} (\Lambda^{-\frac{1}{2}} L \Lambda^{-\frac{1}{2}} + \alpha I)^{-1} \Lambda^{-\frac{1}{2}} \\ &= \Lambda^{-\frac{1}{2}} \left( \sum_{i=1}^n (\gamma_i + \alpha) \mathbf{u}_i \mathbf{u}_i^\top \right)^{-1} \Lambda^{-\frac{1}{2}} \\ &= \Lambda^{-\frac{1}{2}} \left( \sum_{i=1}^n \frac{1}{\gamma_i + \alpha} \mathbf{u}_i \mathbf{u}_i^\top \right) \Lambda^{-\frac{1}{2}} \\ &= \frac{1}{\alpha \sum_i \lambda_i} \mathbf{1}\mathbf{1}^\top + \Lambda^{-\frac{1}{2}} \left( \sum_{i=2}^n \frac{1}{\gamma_i + \alpha} \mathbf{u}_i \mathbf{u}_i^\top \right) \Lambda^{-\frac{1}{2}}. \end{aligned}$$

$\square$

**Proof of Corollary 2.2:**  $\lim_{\alpha \rightarrow 0} E = \Lambda^{-\frac{1}{2}} \bar{L}^\dagger \Lambda^{-\frac{1}{2}}$ .

*Proof.* It follows from  $\bar{L}^\dagger = \sum_{i=2}^n \frac{1}{\gamma_i} \mathbf{u}_i \mathbf{u}_i^\top$ .  $\square$

### Proof of Statements in Sec. 2.1:

Ranking by  $(h_{ij})_{i=1, \dots, n}$  is equivalent as ranking by the  $j$ -th column of  $D^{-\frac{1}{2}} L_{sym}^\dagger D^{-\frac{1}{2}}$ .

*Proof.* Let  $e_i$  denote the  $i$ -th unit vector in  $\mathbb{R}^n$ . The hitting time that a random walk from vertex  $i$  to hit vertex  $j$  can be computed by [1]:

$$\begin{aligned} H_{ij} &= d(\mathcal{V}) \left\langle \frac{1}{\sqrt{d_j}} e_j, L_{sym}^\dagger \left( \frac{1}{\sqrt{d_j}} e_j - \frac{1}{\sqrt{d_i}} e_i \right) \right\rangle \\ &= d(\mathcal{V}) \left( \frac{1}{d_j} e_j^\top L_{sym}^\dagger e_j - \frac{1}{\sqrt{d_i d_j}} e_i^\top L_{sym}^\dagger e_j \right). \end{aligned}$$

Thus given  $j$ , ranking by  $(h_{ij})_{i=1, \dots, n}$  is determined by  $-\frac{1}{\sqrt{d_i d_j}} e_i^\top L_{sym}^\dagger e_j$ . Denote by  $B = (b_{ij}) := D^{-\frac{1}{2}} L_{sym}^\dagger D^{-\frac{1}{2}}$ . Then  $b_{ij} = \frac{1}{\sqrt{d_i d_j}} e_i^\top L_{sym}^\dagger e_j$ . This shows that ranking by  $(h_{ij})_{i=1, \dots, n}$  in ascending order is the same as ranking by  $(b_{ij})_{i=1, \dots, n}$  in descending order. Note that a smaller  $h_{ij}$  means vertices  $i$  and  $j$  are closer on the graph.  $\square$

**Proof of Lemma 3.1:** (a) [2]  $\mathcal{L}_f(\mathcal{S}_k) = \sum_{j \in \bar{\mathcal{S}}_k} a_{1j}$ ,  
(b)  $\lim_{\alpha \rightarrow 0} \mathcal{L}_f(\mathcal{S}_k) = \lambda(\bar{\mathcal{S}}_k)/\lambda(\mathcal{V})$ ,  $1 \leq k \leq n$ .

*Proof.* (a) Recall that  $\mathbf{f}$  is the first column of  $M = (L + \alpha\Lambda)^{-1}$ . We have  $(L + \alpha\Lambda)\mathbf{f} = \mathbf{e}_1$ , which can be written as:

$$\sum_{j \neq 1} w_{1j}(\mathbf{f}_1 - \mathbf{f}_j) = 1 - \alpha\lambda_1\mathbf{f}_1, \quad (1)$$

$$\sum_{j \neq i} w_{ij}(\mathbf{f}_i - \mathbf{f}_j) = -\alpha\lambda_i\mathbf{f}_i, \quad i \neq 1. \quad (2)$$

By Eq. (1) and Eq. (2), we have

$$\begin{aligned} \mathcal{L}_f(\mathcal{S}_k) &= \sum_{i=1}^k \sum_{j \neq i} w_{ij}(\mathbf{f}_i - \mathbf{f}_j) = 1 - \sum_{i=1}^k \alpha\lambda_i\mathbf{f}_i \\ &= 1 - \sum_{j \in \mathcal{S}_k} a_{1j} = \sum_{j \in \bar{\mathcal{S}}_k} a_{1j}. \end{aligned} \quad (3)$$

Note that in Eq. (3), since  $A = (a_{ij}) = (L + \alpha\Lambda)^{-1}\alpha\Lambda$ ,  $\alpha\lambda_i\mathbf{f}_i = a_{1i}$ . We also use the fact that  $\sum_j a_{1j} = 1$ .

(b) By Theorem 2.1.,

$$\begin{aligned} A &= (L + \alpha\Lambda)^{-1}\alpha\Lambda \\ &= \frac{1}{\sum_i \lambda_i} \mathbf{1}\mathbf{1}^\top \Lambda + \alpha\Lambda^{-\frac{1}{2}} \left( \sum_{i=2}^n \frac{1}{\gamma_i + \alpha} \mathbf{u}_i \mathbf{u}_i^\top \right) \Lambda^{\frac{1}{2}}. \end{aligned}$$

Therefore,  $\lim_{\alpha \rightarrow 0} A = \frac{1}{\sum_i \lambda_i} \mathbf{1}\mathbf{1}^\top \Lambda$ . By Eq. (3), we have  $\lim_{\alpha \rightarrow 0} \mathcal{L}_f(\mathcal{S}_k) = \lambda(\bar{\mathcal{S}}_k)/\lambda(\mathcal{V})$ .  $\square$

**Proof of Theorem 3.4:**  $\mathcal{R}_f(\mathcal{S}_c) < 1/(c-1)$ .

*Proof.* Since  $\mathcal{L}_f(\mathcal{S}_k) = \sum_{j \in \bar{\mathcal{S}}_k} a_{1j}$  strictly decreases when  $k$  increases,  $\forall k < c$ ,  $\mathcal{L}_f(\mathcal{S}_c) < \mathcal{L}_f(\mathcal{S}_k)$ .  $\square$

**Proof of Theorem 3.5:**

(a) If  $d_i = b$ ,  $\forall i$ , for some constant  $b$ , then  $\lim_{\alpha \rightarrow 0} \mathcal{R}_i(\mathcal{S}_c) = \lim_{\alpha \rightarrow 0} \mathcal{R}_\partial(\mathcal{S}_c)$ .

(b) Suppose for  $1 \leq k < c$ ,  $\frac{d(\mathcal{S}_c \setminus \mathcal{S}_k)}{|\mathcal{S}_c \setminus \mathcal{S}_k|} > \frac{d(\bar{\mathcal{S}}_c)}{|\bar{\mathcal{S}}_c|}$ . Then  $\lim_{\alpha \rightarrow 0} \mathcal{R}_i(\mathcal{S}_c) > \lim_{\alpha \rightarrow 0} \mathcal{R}_\partial(\mathcal{S}_c)$ .

(c) Suppose for  $1 \leq k < c$ ,  $\frac{d(\mathcal{S}_c \setminus \mathcal{S}_k)}{|\mathcal{S}_c \setminus \mathcal{S}_k|} < \frac{d(\bar{\mathcal{S}}_c)}{|\bar{\mathcal{S}}_c|}$ . Then  $\lim_{\alpha \rightarrow 0} \mathcal{R}_i(\mathcal{S}_c) < \lim_{\alpha \rightarrow 0} \mathcal{R}_\partial(\mathcal{S}_c)$ .

*Proof.* (a) It follows from  $d(\bar{\mathcal{S}}_k) = b|\bar{\mathcal{S}}_k|$ , for  $1 \leq k \leq c$ .

(b) Since for  $1 \leq k < c$ ,  $\frac{d(\mathcal{S}_c \setminus \mathcal{S}_k)}{d(\bar{\mathcal{S}}_c)} > \frac{|\mathcal{S}_c \setminus \mathcal{S}_k|}{|\bar{\mathcal{S}}_c|}$ , we have  $\frac{d(\bar{\mathcal{S}}_k)}{d(\bar{\mathcal{S}}_c)} = \frac{d(\mathcal{S}_c \setminus \mathcal{S}_k) + d(\bar{\mathcal{S}}_c)}{d(\bar{\mathcal{S}}_c)} > \frac{|\mathcal{S}_c \setminus \mathcal{S}_k| + |\bar{\mathcal{S}}_c|}{|\bar{\mathcal{S}}_c|} = \frac{|\mathcal{S}_k|}{|\bar{\mathcal{S}}_c|}$ .

(c) The proof is similar to that of (b).  $\square$

**Proof of Lemma 3.6:**

$$\lim_{d(\mathcal{S}_c)/d(\bar{\mathcal{S}}_c) \rightarrow 0} \lim_{\alpha \rightarrow 0} \mathcal{R}_\partial(\mathcal{S}_c) = \frac{1}{c-1}.$$

*Proof.*  $\frac{1}{\lim_{\alpha \rightarrow 0} \mathcal{R}_\partial(\mathcal{S}_c)} = \frac{\sum_{k=1}^{c-1} d(\bar{\mathcal{S}}_k)}{d(\bar{\mathcal{S}}_c)} = \frac{\sum_{k=1}^{c-1} (d(\mathcal{S}_c \setminus \mathcal{S}_k) + d(\bar{\mathcal{S}}_c))}{d(\bar{\mathcal{S}}_c)} = c - 1 + \frac{\sum_{k=1}^{c-1} d(\mathcal{S}_c \setminus \mathcal{S}_k)}{d(\bar{\mathcal{S}}_c)}$ . As  $\frac{d(\mathcal{S}_c)}{d(\bar{\mathcal{S}}_c)} \rightarrow 0$ , we have  $\frac{d(\mathcal{S}_c \setminus \mathcal{S}_k)}{d(\bar{\mathcal{S}}_c)} \rightarrow 0$  for  $k < c$ , which completes the proof.  $\square$

**Proof of Lemma 3.7:**  $\lim_{d(\mathcal{S}_c)/d(\bar{\mathcal{S}}_c) \rightarrow \infty} \lim_{\alpha \rightarrow 0} \mathcal{R}_\partial(\mathcal{S}_c) = 0$ ,

if  $d_1 < td(\mathcal{S}_c)$  for a fixed scalar  $t$ ,  $0 < t < 1$ .

*Proof.*  $\frac{1}{\lim_{\alpha \rightarrow 0} \mathcal{R}_\partial(\mathcal{S}_c)} = \frac{\sum_{k=1}^{c-1} d(\bar{\mathcal{S}}_k)}{d(\bar{\mathcal{S}}_c)} \geq \frac{d(\bar{\mathcal{S}}_1)}{d(\bar{\mathcal{S}}_c)} \geq \frac{d(\bar{\mathcal{S}}_1) + d_1 - d_1}{d(\bar{\mathcal{S}}_c)} \geq \frac{d(\bar{\mathcal{S}}_c) - d_1}{d(\bar{\mathcal{S}}_c)} \geq \frac{(1-t)d(\bar{\mathcal{S}}_c)}{d(\bar{\mathcal{S}}_c)} \rightarrow \infty$ , as  $\frac{d(\bar{\mathcal{S}}_c)}{d(\bar{\mathcal{S}}_c)} \rightarrow \infty$ .  $\square$

**Proof of Theorem 3.8:** Suppose for  $1 \leq k < c$ ,  $\frac{d(\mathcal{S}_c \setminus \mathcal{S}_k)}{|\mathcal{S}_c \setminus \mathcal{S}_k|} < \frac{d(\mathcal{S}' \setminus \mathcal{S}_c) + \tau \hat{d}}{|\mathcal{S}_c|}$ . Then  $\lim_{\alpha \rightarrow 0} \mathcal{R}_i(\mathcal{S}_c) < \lim_{\alpha \rightarrow 0} \mathcal{R}_\partial(\mathcal{S}_c)$ .

*Proof.* Since for  $1 \leq k < c$ ,  $\frac{d(\mathcal{S}_c \setminus \mathcal{S}_k)}{d(\mathcal{S}' \setminus \mathcal{S}_c) + \tau \hat{d}} < \frac{|\mathcal{S}_c \setminus \mathcal{S}_k|}{|\mathcal{S}_c|}$ , we have  $\frac{d(\mathcal{S}' \setminus \mathcal{S}_k) + \tau \hat{d}}{d(\mathcal{S}' \setminus \mathcal{S}_c) + \tau \hat{d}} = \frac{d(\mathcal{S}_c \setminus \mathcal{S}_k) + d(\mathcal{S}' \setminus \mathcal{S}_c) + \tau \hat{d}}{d(\mathcal{S}' \setminus \mathcal{S}_c) + \tau \hat{d}} < \frac{|\mathcal{S}_c \setminus \mathcal{S}_k| + |\mathcal{S}_c|}{|\mathcal{S}_c|} = \frac{|\mathcal{S}_k|}{|\mathcal{S}_c|}$ . Therefore, for  $1 \leq k < c$ ,  $\frac{d(\mathcal{S}' \setminus \mathcal{S}_c) + \tau \hat{d}}{d(\mathcal{S}' \setminus \mathcal{S}_k) + \tau \hat{d}} > \frac{|\mathcal{S}_c|}{|\mathcal{S}_k|}$ . This proves  $\lim_{\alpha \rightarrow 0} \mathcal{R}_i(\mathcal{S}_c) < \lim_{\alpha \rightarrow 0} \mathcal{R}_\partial(\mathcal{S}_c)$ .  $\square$

**Proof of Lemma 3.9:**

$$\lim_{\max_{i \in \mathcal{S}_c} d_i / \hat{d} \rightarrow 0} \lim_{\alpha \rightarrow 0} \mathcal{R}_\partial(\mathcal{S}_c) = \frac{1}{c-1}.$$

*Proof.*  $\frac{1}{\lim_{\alpha \rightarrow 0} \mathcal{R}_\partial(\mathcal{S}_c)} = \frac{d(\mathcal{S}' \setminus \mathcal{S}_c) + \tau \hat{d}}{d(\mathcal{S}' \setminus \mathcal{S}_c) + \tau \hat{d}} = \frac{\sum_{k=1}^{c-1} (d(\mathcal{S}_c \setminus \mathcal{S}_k) + d(\mathcal{S}' \setminus \mathcal{S}_c) + \tau \hat{d})}{d(\mathcal{S}' \setminus \mathcal{S}_c) + \tau \hat{d}} = c - 1 + \frac{\sum_{k=1}^{c-1} d(\mathcal{S}_c \setminus \mathcal{S}_k)}{d(\mathcal{S}' \setminus \mathcal{S}_c) + \tau \hat{d}}$ . As  $\frac{\max_{i \in \mathcal{S}_c} d_i}{\hat{d}} \rightarrow 0$ , we have  $\frac{d(\mathcal{S}_c \setminus \mathcal{S}_k)}{d(\mathcal{S}' \setminus \mathcal{S}_c) + \tau \hat{d}} \rightarrow 0$  for  $k < c$ , which completes the proof.  $\square$

**Proof of Theorem 3.10:** Suppose for  $1 \leq k < c$ ,  $\frac{d(\mathcal{S}_c \setminus \mathcal{S}_k)}{|\mathcal{S}_c \setminus \mathcal{S}_k|} > \frac{d(\bar{\mathcal{S}}_c)}{|\mathcal{S}^* \setminus \mathcal{S}_c| + d(\bar{\mathcal{S}}_*)}$ . Then  $\lim_{\alpha \rightarrow 0} \mathcal{R}_\partial(\mathcal{S}_c) > \lim_{\alpha \rightarrow 0} \mathcal{R}_\partial(\mathcal{S}_c)$ .

*Proof.* Since for  $1 \leq k < c$ ,  $\frac{d(\mathcal{S}_c \setminus \mathcal{S}_k)}{d(\bar{\mathcal{S}}_c)} > \frac{|\mathcal{S}_c \setminus \mathcal{S}_k| \hat{d}}{|\mathcal{S}^* \setminus \mathcal{S}_c| \hat{d} + d(\bar{\mathcal{S}}_*)}$ , we have  $\frac{d(\bar{\mathcal{S}}_k)}{d(\bar{\mathcal{S}}_c)} = \frac{d(\mathcal{S}_c \setminus \mathcal{S}_k) + d(\bar{\mathcal{S}}_c)}{d(\bar{\mathcal{S}}_c)} > \frac{|\mathcal{S}_c \setminus \mathcal{S}_k| \hat{d} + |\mathcal{S}^* \setminus \mathcal{S}_c| \hat{d} + d(\bar{\mathcal{S}}_*)}{|\mathcal{S}^* \setminus \mathcal{S}_c| \hat{d} + d(\bar{\mathcal{S}}_*)} = \frac{|\mathcal{S}^* \setminus \mathcal{S}_k| \hat{d} + d(\bar{\mathcal{S}}_*)}{|\mathcal{S}^* \setminus \mathcal{S}_c| \hat{d} + d(\bar{\mathcal{S}}_*)}$ . Therefore, for  $1 \leq k < c$ ,  $\frac{d(\bar{\mathcal{S}}_c)}{d(\bar{\mathcal{S}}_k)} < \frac{|\mathcal{S}^* \setminus \mathcal{S}_c| \hat{d} + d(\bar{\mathcal{S}}_*)}{|\mathcal{S}^* \setminus \mathcal{S}_k| \hat{d} + d(\bar{\mathcal{S}}_*)}$ . This proves  $\lim_{\alpha \rightarrow 0} \mathcal{R}_\partial(\mathcal{S}_c) < \lim_{\alpha \rightarrow 0} \mathcal{R}_\partial(\mathcal{S}_c)$ .  $\square$

## References

- [1] U. von Luxburg, A. Radl, and M. Hein. Hitting and commute times in large random neighborhood graphs. *Journal of Machine Learning Research*, 15:1751–1798, 2014. [1](#)
- [2] X.-M. Wu, Z. Li, and S.-F. Chang. Analyzing the harmonic structure in graph-based learning. In *NIPS*, 2013. [2](#)
- [3] X.-M. Wu, Z. Li, and S.-F. Chang. New insights into laplacian similarity search. In *CVPR*, 2015. [1](#)
